1 **Ancient mitochondrial DNA pathogenic variants putatively associated with mitochondrial**  
2 **disease**

3

4

5 Draga Toncheva<sup>1,2</sup>, Dimitar Serbezov<sup>1</sup>, Sena Karachanak-Yankova<sup>1,3</sup>, Desislava Nesheva<sup>1</sup>

6

7 <sup>1</sup>Department of Medical Genetics, Medical University of Sofia, Bulgarian Academy of Science,

8 Sofia, Bulgaria

9 <sup>2</sup>Bulgarian Academy of Sciences – BAS, Sofia, Bulgaria

10 <sup>3</sup>Department of Genetics, Faculty of biology, Sofia University “St. Kliment Ohridski”, Sofia,

11 Bulgaria

12

13

14 Corresponding author:

15 Prof. Draga Toncheva

16 Department of Medical Genetics, Faculty of Medicine

17 Medical University of Sofia, Bulgaria

18 Dean Office, Zdrave str. 2,

19 1431 Sofia, Bulgaria

20

21 **Keywords:** mitochondrial genomes, ancient DNA, pathogenic variants

## 22 **Abstract**

23 Mitochondrial DNA variants associated with diseases are widely studied in contemporary  
24 populations, but their prevalence has not yet been investigated in ancient populations. The publicly  
25 available AmtDB database contains 1443 ancient mtDNA Eurasian genomes from different  
26 periods. The objective of this study was to use this data to establish the presence of pathogenic  
27 mtDNA variants putatively associated with mitochondrial diseases in ancient populations. The  
28 clinical significance, pathogenicity prediction and contemporary frequency of mtDNA variants  
29 were determined using online platforms. The analyzed ancient mtDNAs contain six variants  
30 designated as being “*confirmed pathogenic*” in modern patients. The oldest of these, m.7510T>C  
31 in the *MT-TS1* gene, was found in a sample from the Neolithic period dated 5800-5400 BCE. All  
32 six have well established clinical association, and their pathogenic effect is corroborated by very  
33 low population frequencies in contemporary populations. In addition, ten variants designated as  
34 possibly or likely pathogenic were detected. The oldest of these were two variants in the *MT-TD*  
35 gene, m.7543A>G and m.7554G>A, from Neolithic samples dated 8205-7700 BCE. A novel  
36 mutation in contemporary populations, m.4440G>A in the *MT-TM* gene, is established in 12 ancient  
37 mtDNA samples from different periods ranging from 2800 BCE to 920 CE. The pathogenic effect  
38 of these possibly/likely pathogenic mutations is not yet well established, and further research is  
39 warranted. All detected mutations putatively associated with mitochondrial disease in ancient  
40 mtDNA samples are in tRNA coding genes. Most of these mutations are in a mt-tRNA type (Model  
41 2) that is characterized by loss of D-loop/T-loop interaction. Seven mutations are located in CS-  
42 Anticodon stem, 4 are located in AS-Acceptor stem, 2 in TS-TΨC stem, and single mutations are  
43 found in DL-Dihydrouridine Loop, CL-Anticodon Loop and DS-Dihydrouridine stem. Exposing  
44 pathogenic variants in ancient human populations expands our understanding of their origin.

## 45 **Introduction**

46 The scarcity of prehistoric human remains hampers obtaining complete picture of disorder  
47 incidence in ancient times. Altered or affected bones in skeletal remains might provide information  
48 about certain diseases, such as cancers (1, 2) and rheumatic diseases (3). A lesion on an archaic  
49 *Homo* mandible from Kanam, Kenya (Middle to Late Pleistocene) (4) and a fibrous dysplasia on a  
50 Neanderthal rib (older than 120000 years) from the site of Krapina, Croatia (5) are early  
51 confirmation of neoplastic disease. Neoplastic tumors have however been detected in early *Homo*  
52 samples as old as 1.7 million years ago, and these provide further insight into the outset of human  
53 cancers (6). Mummified human remains of a 5300-year-old Neolithic man (Ötzi, The Tyrolean  
54 Iceman) show hardening of the arteries, suggesting predisposition for coronary heart disease (7).  
55 Based on information on subsistence, geography and sample age, Berens *et al* (2017) estimate the  
56 genetic disease risk for 3180 loci in 147 ancient genomes, and find it to be similar to that of modern  
57 day humans (8). Focusing on individual genomes, however, they estimate that the overall genomic  
58 health of the Altai Neanderthal is worse than 97% of present day humans and that Ötzi the Tyrolean  
59 Iceman had a genetic predisposition to gastrointestinal and cardiovascular diseases (8).

60 Data on the prehistoric origin of mitochondrial diseases is however notably lacking. The first  
61 disease linked directly to mtDNA mutation was discovered in 1988 (9). Recently, whole-genome  
62 sequencing of mtDNA has led to significant advances in our understanding of mitochondrial  
63 diseases. Rare pathogenic mutations in mitochondrial DNA cause monogenic mitochondrial  
64 diseases involving multiple systems and are associated with variable clinical phenotypes. The  
65 severity of the clinical and biochemical phenotype caused by pathogenic mtDNA mutations has  
66 however been found to be roughly proportionate to the percent mutant heteroplasmy (10, 11).  
67 Nucleotide polymorphisms accumulate in mtDNA during human evolution forming mitochondrial

68 haplogroups, and these also might alter the penetrance of mitochondrial diseases (12). Specific  
69 subclades of haplogroup J, for example, have been shown to affect the penetrance and  
70 pathogenicity of Leber's hereditary optic neuropathy (13). Certain mtDNA mutations and  
71 haplogroups are also predictors of both lifespan and risk of various age-associated disease,  
72 including degenerative diseases, cancer, diabetes, heart failure, sarcopenia and Parkinson's disease  
73 (14).

74 We had previously performed whole-genome sequencing on 25 Thracian mtDNA samples dated  
75 3000-2000 BCE, and 608 mtDNA variants were detected (15). Only one of these, however,  
76 m.15326A>G (rs2853508) is designated as likely pathogenic, associated with familial breast cancer  
77 (16). This variant was found in all analyzed by us samples, and MitoMap (2019, update nr.3)  
78 database estimates 0.98 population frequency (17). Such high frequency leads to the conclusion  
79 that this variant is common and probably not disease related.

80 The objective of this study was to investigate pathogenic mutations in ancient mtDNA and thus to  
81 provide further insight into the emergence of mitochondrial diseases.

## 82 **Materials & Methods**

83 We used the comprehensive data of the ancient mtDNA genome sequences from the Ancient  
84 mtDNA database (18) which compiles human mitochondrial variation studies in ancient  
85 populations. We analyzed the *fasta* files of 1443 samples from different periods: Paleolithic 10,  
86 Mesolithic 96; Neolithic 341; Copper 242; Bronze 368; Iron 152 and Middle Ages 234, analyzed  
87 by whole genome sequencing. The total number of variants detected in these samples was 3191.

88 We used various publicly available databases to gather information to identify mtDNA sequence  
89 variants and to gather information about each variant, including its clinical significance and  
90 contemporary population frequencies:

91 • MitoMap (2019, update nr.3) is a human mitochondrial genome database that contains  
92 14383 SNVs, 49135 full-length sequences and 72235 control region sequences (17).

93 MitoMap classifies a variant as being “confirmed pathogenic” if it meets the set of criteria outlined  
94 by Mitchell et al 2006 (19), Yarham et al 2011 (20), Wong 2007 (21) and Gonzalez-Vioque et al  
95 2014 (22): (1) independent reports of two or more unrelated families with evidence of similar  
96 disease; (2) evolutionary conservation of the nucleotide (for RNA variants) or amino acid (for  
97 coding variants); (3) presence of heteroplasmy; (4) correlation of variant with phenotype /  
98 segregation of the mutation with the disease within a family; (5) biochemical defects in the  
99 OXPHOS genes constituent complexes I, III, or IV in affected or in multiple tissues; (6) functional  
100 studies showing differential defects segregating with the mutation (cybrid or single fiber studies);  
101 (7) histochemical evidence of a mitochondrial disorder; and (8) for fatal or severe phenotypes, the  
102 absence or extremely rare occurrence of the variant in large mtDNA sequence databases.

103 • MITOMASTER was used to identify, annotate and evaluate the potential biological  
104 significance of nucleotide variants (23).

105 • GenBank database provides access to the most up-to-date and exhaustive DNA sequence  
106 information, and was used to get information on variant frequencies in contemporary  
107 populations (24).

108 • MitoTIP is an *in silico* tool for predicting pathogenicity of novel mitochondrial tRNA  
109 variants (25). It integrates multiple sources of information, including the position of the  
110 variant within the tRNA, conservation across species and population frequencies, to provide  
111 a prediction for the likelihood that novel single nucleotide variants would cause disease.

112 • HmtVar uses algorithms to determine the importance of the variant position in tRNAs and  
113 was utilized to predict the pathogenicity and potential impact of mtDNA variants (26).

- 114       • Complementing the information obtained using the abovementioned tools, literature survey  
115       was performed on variants designated as “*confirmed pathogenic*” in an effort to acquire  
116       comprehensive picture of the evidence for their disease causing effect.

## 117 **Results**

118    Out of 3191 unique mtDNA variants established in the 1443 analyzed ancient samples, six are  
119    designated as being “*confirmed pathogenic*” and 10 as likely/possibly pathogenic by MitoMap. For  
120    each of these variants, we review the available evidence in HmtVar and in the scientific literature  
121    for their pathogenic effects.

### 122 *Confirmed pathogenic mutations*

#### 123 **m.5703G>A (rs199476130)**

124    The variant m.5703G>A was found in four ancient mtDNA samples, one from the Neolithic period,  
125    three from the Iron Age and one from the Middle Ages. The two Iron Age samples are from the  
126    same site in Russia, extracted from the remains of a male and a female, and these two individuals  
127    might have been related (27). This is also the pathogenic variant established in ancient mtDNA  
128    from archeological sites spanning the widest geographical range, i.e. from Poland to Mongolia  
129    (Figure 1). This mutation is in the *MT-TN* gene, which encodes tRNA Asparagine (Table 1).  
130    MitoMap and HmtVar designate this mutation as pathogenic.

131    Figure 1. Geographic location of the Eurasian archaeological sites where mtDNA samples  
132    containing “*confirmed pathogenic*” variants had been found (cf. Table 1). Map source: Google  
133    Maps

134    Our literature survey for the m.5703G>A mutation finds that it has been reported to cause  
135    mitochondrial myopathy and ophtalmoplegia (MM) (28, 29). Recently, its phenotypic spectrum

136 was broadened by a report of a patient with typical myoclonic epilepsy with ragged red fiber  
137 (MERRF) syndrome carrying a heteroplasmic m.5703G>A mutation (30, 31). In another recent  
138 study, however, it has been argued that investigations carried out to confirm pathogenicity of this  
139 mutation are insufficient (32).

#### 140 **m.3243A>G (rs199474657)**

141 This variant was detected in a sample from a site in Germany from the Bronze Age (2029-1911  
142 BCE) (Table 1, Figure 1). The mutation is in the *MT-TL1* gene, which encodes tRNA Leucine.  
143 MitoMap and HmtVar designate this mutation as pathogenic.

144 Population-based studies suggest the m.3243A>G mutation is the most common disease-causing  
145 mtDNA mutation, with a carrier rate of 1 in 400 people (33). The pathogenic mitochondrial DNA  
146 m.3243A>G mutation has been shown to be associated with a wide range of symptoms (34).  
147 Elevated heteroplasmy at this mtDNA site has been shown to lead to neurologic, sensory,  
148 movement, metabolic, and cardiopulmonary impairments (35). This mutation is associated with  
149 mitochondrial encephalopathy lactic acidosis and stroke-like episodes (MELAS) (36), maternally  
150 inherited deafness and diabetes (MIDD) (37) and chronic progressive external ophthalmoplegia  
151 (CPEO) (38). Other reported features include renal failure (39), isolated myopathy,  
152 cardiomyopathy, seizures, migraine, ataxia, cognitive impairment, bowel dysmotility and short  
153 stature (40). Low to moderate levels of mutant heteroplasmy in the m.3243G>A mutation are often  
154 associated with MIDD, whereas higher levels are variably associated with myopathy, high  
155 frequency sensorineural hearing loss, short stature, epilepsy, strokes and dementia (11, 41, 42).

#### 156 **m.5650G>A**

157 This variants was found in 3 samples from the Iron Age, but they are from different Central Asian  
158 sites and time periods (ranging from 900 BCE to 134 BCE), so the individuals they were taken  
159 from are in all likelihood unrelated. This mutation is in the *MT-TA* gene, which encodes tRNA  
160 Alanine. MitoMap and HmtVar designate this mutation as pathogenic (Table 1, Figure 1).

161 McFarland et al. (2008) report a family where proximal myopathy has become increasingly severe  
162 with successive generations of the maternal lineage, and this pure myopathy is shown to be caused  
163 by the m.5650G>A mutation (43). Finnila et al. (2001) describe a patient with MERRF, who had  
164 a *de novo* m. 5650G>A mutation in the tRNA Alanine gene (44). The mutation was heteroplasmic,  
165 with the proportions of the mutant genome being up to 99% in muscle. They suggest that the  
166 mtDNA mutation is pathogenic as it was associated with a relevant clinical phenotype, it is absent  
167 in controls, and it alters a structurally important segment in the amino acid acceptor stem in the  
168 tRNA Alanine (Figure 2).

#### 169 **m.8340G>A**

170 The variant was found in one sample from the Middle Ages (10-375 CE). This mutation is in the  
171 *MT-TK* gene, which encodes tRNA Lysine. MitoMap and HmtVar designate this mutation as  
172 pathogenic.

173 A number of studies have established association between the m.8340G>A variant and various  
174 clinical conditions. Jeppesen et al. (2014) report two patients with a *de novo* m.8340G>A variant  
175 associated with exercise intolerance, CPEO and myopathy (45). Gill et al (2017) report a patient  
176 carrying this mutation with cataracts, pigmented retinopathy, rod-cone dysfunction and sensory  
177 neural deafness without myopathy (46). Tamopolsky et al. (2019) report a case with a *de novo*  
178 m.8340G>A DNA mutation associated with mitochondrial myopathy, ptosis and



179 ophthalmoparesis, corroborating the pathogenicity of the m.8340G>A mutation (47). The  
180 collective data is consistent with a categorization of “pathogenic” given that the variant is found in  
181 much higher frequency in patients (3 reports) vs a control population and with much higher  
182 heteroplasmy levels reported in ragged blue fibers and COX-negative vs healthy fibers (45, 46).

### 183 **m.14674T>C**

184 The variant was found in one sample from Poland from the Bronze Age (1592-1591 BCE). This  
185 mutation is in the *MT-TE* gene, which encodes tRNA Glutamic acid. MitoMap and HmtVar  
186 designate this mutation as “pathogenic” (Table 1, Figure 1).

187 A study by Houshmand et al (1994) describes two patients with Mitochondrial myopathy (MM)  
188 that are carriers of the m.14674T>C mutation. Even though it is absent in controls, the authors  
189 presume this mutation, as it does not change nucleotides that are conserved between species, is not  
190 likely to be pathogenic. This homoplasmic mutation has been identified in reversible infantile  
191 cytochrome c oxidase deficiency (or “Benign COX deficiency”) (48). Carriers of this mutation  
192 experience subacute onset of profound hypotonia, feeding difficulties and lactic acidosis within the  
193 first months of life. Although recovery may occur, mild myopathy persists into adulthood (49).

### 194 **m.7510T>C (rs199474820)**

195 This variants was found in one sample from Bulgaria from the Neolithic period, estimated to be  
196 from 5800-5400 BCE, and is thus the oldest pathogenic variant detected in this study. This mutation  
197 is located in the *MT-TSI* gene, which encodes tRNA Serine. MitoMap and HmtVar designates this  
198 mutation as pathogenic (Table 1, Figure 1).

199 A number of studies have established association between the m.7510T>C mutation and non-  
200 syndromic sensorineural hearing impairment (SNHL) (50-53). Review of the published cases

201 suggests that there is interfamilial variability in the age of onset, accompanying symptoms, and  
202 haplogroup background (50). The results of Kytövuori *et al* (2017) suggest that in addition to  
203 sensorineural hearing impairment, the m.7510T>C mutation is associated with a spectrum of  
204 mitochondrial disease clinical features including migraine, epilepsy, cognitive impairment, ataxia,  
205 and tremor, and with evidence of mitochondrial myopathy (54).

206 *Likely/possibly pathogenic mutations*

207 This group includes mutations for which there is discrepancy in their clinical effect designation  
208 between the two used platforms. Whereas HmtVar classifies them as pathogenic, MitoMap  
209 classifies them as likely or possibly pathogenic (Table 1).

210 **Table 1.** Mitochondrial DNA mutations established in ancient samples putatively associated with mitochondrial disease.

| Pathogenic mutations |                                              |                            |                                                       |          |                         |                     |                                                                                                           |
|----------------------|----------------------------------------------|----------------------------|-------------------------------------------------------|----------|-------------------------|---------------------|-----------------------------------------------------------------------------------------------------------|
| Nr                   | Variants (17, 18)/ Gene product/ Strand (26) | Period/Years (18)          | Country / Location / Sample                           | GB Freq. | Mito Tip classification | HmtVar Prediction   | Mitochondrial Disease (MitoMap)                                                                           |
| 1                    | m.5703G>A (rs199476130) tRNA Asparagine /L   | Neolithic (2880-2776 BCE)  | Poland / Koszyce / RISE1170 (55)                      | 0.00%    | Cfrm Path.              | Pathogenic (M2-P27) | CPEO / MM / COX deficiency (Heteroplasmy)                                                                 |
|                      |                                              | Iron Age (900-600 BCE)     | Russia / Grishkin Log 1 / DA4 (27)                    |          |                         |                     |                                                                                                           |
|                      |                                              | Iron Age (156-134 BCE)     | Mongolia / Omnogobi / DA45 (27)                       |          |                         |                     |                                                                                                           |
|                      |                                              | Middle Ages (10-375 CE)    | Poland / Kowalewko, Greater Poland / PCA0002 (56)     |          |                         |                     |                                                                                                           |
| 2                    | m.3243A>G (rs199474657) tRNA Leucine/H       | Bronze Age (2029-1911 BCE) | Germany / Haunstetten, Postillionstr . / POST_16 (57) | 0.02%    | Cfrm Path.              | Pathogenic (M0-P14) | MELAS / LS / DMDF / MIDD / SNHL / CPEO / MM / FSGS / ASD / Cardiac+multi-organ dysfunction (Heteroplasmy) |
| 3                    | m.5650G>A tRNA Alanine/L                     | Iron Age (900-600 BCE)     | Russia / Grishkin Log 1 / DA5 (27)                    | 0.00%    | Cfrm Path.              | Pathogenic (M2-P6)  | Myopathy (Heteroplasmy)                                                                                   |
|                      |                                              | Iron Age (766-729 BCE)     | Kazakhstan / Kurgan Borli, Osakarovskij / DA11 (27)   |          |                         |                     |                                                                                                           |
|                      |                                              | Iron Age (156-134 BCE)     | Mongolia / Omnogobi / DA45 (27)                       |          |                         |                     |                                                                                                           |
| 4                    | m.8340G>A, tRNA Lysine/H                     | Middle Ages (10-375 CE)    | Poland / Kowalewko, Greater Poland / PCA0018 (56)     | 0.00%    | Cfrm Path               | Pathogenic (M2-P51) | Myopathy/Exercise Intolerance/Eye disease+SNHL                                                            |

|                                   |                                             |                                  |                                                                                 |       |           |                        |                                                       |
|-----------------------------------|---------------------------------------------|----------------------------------|---------------------------------------------------------------------------------|-------|-----------|------------------------|-------------------------------------------------------|
| 5                                 | m.14674T>C,<br>tRNA<br>Glutamic<br>acid/L   | Bronze Age<br>(1592-1591<br>BCE) | Mongolia / Mitjurino / DA231<br>(27)                                            | 0.01% | Cfrm Path | Pathogenic<br>(M2-P73) | Reversible COX deficiency<br>myopathy<br>(Homoplasmy) |
| 6                                 | m.7510T>C<br>(rs199474820)<br>tRNA Serine/L | Neolithic<br>(5800-5400<br>BCE)  | Bulgaria / Malak Preslavets /<br>I1109 (58)                                     | 0.00% | Cfrm Path | Pathogenic<br>(M1-P5)  | SNHL<br>(Heteroplasmy)                                |
| <b>Likely/Possibly pathogenic</b> |                                             |                                  |                                                                                 |       |           |                        |                                                       |
| 7                                 | m.1624C>T<br>tRNA<br>Valine/H               | Middle Ages<br>(10-375 CE)       | Poland / Kowalewko, Greater<br>Poland / PCA0037 (55)                            | 0.00% | PP        | Pathogenic<br>(M2-P25) | Leigh Syndrome<br>(Homoplasmy)                        |
| 8                                 | m.4440G>A<br>tRNA<br>Methionine/H           | Neolithic<br>(2800-2776<br>BCE)  | Poland / Koszyce/ PCA0037 (55)                                                  | 0.00% | PP        | Pathogenic<br>(M2-P42) | MM<br>(Heteroplasmy)                                  |
|                                   |                                             | Iron Age (900-<br>600 BCE)       | Russia / Grishkin Log 1 / DA9<br>(27)                                           |       |           |                        |                                                       |
|                                   |                                             | Iron Age (800-<br>773 BCE)       | Kazakhstan / Birlik, Kurgan 12,<br>Bajanaul DA17 (27)                           |       |           |                        |                                                       |
|                                   |                                             | Iron Age (600-<br>400 BCE)       | Kazakhstan / Karaganda, Kurgan<br>Sjartas, Shetskiy / DA10 (27)                 |       |           |                        |                                                       |
|                                   |                                             | Iron Age (357-<br>342 BCE)       | Kazakhstan / Kurgan Sjiderti 17,<br>Burial 1, Sjiderte, Pavlodar /<br>DA20 (27) |       |           |                        |                                                       |
|                                   |                                             | Iron Age (201-<br>148 BCE)       | Mongolia / Hovsgol, Grave #18 /<br>DA38 (27)                                    |       |           |                        |                                                       |
|                                   |                                             | Iron Age (49<br>BCE-53 CE)       | Mongolia / Arkhangai, Grave #1 /<br>DA39 (27)                                   |       |           |                        |                                                       |

|    |                                 |                           |                                                                           |       |    |                     |                                                                        |
|----|---------------------------------|---------------------------|---------------------------------------------------------------------------|-------|----|---------------------|------------------------------------------------------------------------|
|    |                                 | Iron Age (47 BCE-24 CE)   | Kazakhstan / Naurzum, Kurgan (3), Naurzumskijzapovednik DA30 (27)         |       |    |                     |                                                                        |
|    |                                 | Iron Age (177-190 CE)     | Kazakhstan / Kurgan nr. 50, Japyryk / DA81 (27)                           |       |    |                     |                                                                        |
|    |                                 | Iron Age (397-570 CE)     | Kazakhstan / Kurgan nr. 1, Baskya 2 / DA385 (27)                          |       |    |                     |                                                                        |
|    |                                 | Middle Ages (550-850 CE)  | Kazakhstan / Bt, 2015, area 1, element 1, layer 3, skeleton 6/ DA228 (27) |       |    |                     |                                                                        |
|    |                                 | Middle Ages (901-920 CE)  | Kazakhstan / Almaly, Kurgan 1, Object 1, Issyk, Tian Shan / DA126 (27)    |       |    |                     |                                                                        |
| 9  | m.5628T>C, tRNA Alanine/L       | Iron Age (400-200 BCE)    | Moldova / Glinoe / SCY308 (59)                                            | 0.19% | LP | Pathogenic (M2-P31) | CPEO / DEAF enhancer / gout (Heteroplasmy)                             |
| 10 | m.7543A>G tRNA Aspartic acid /H | Neolithic (8200-7700 BCE) | Iran / Tepe Abdul Hosein, Central Zagros / AH1 (60)                       | 0.09% | PP | Pathogenic (M2-P29) | MEPR (Heteroplasmy)                                                    |
| 11 | m.7554G>A, tRNA Aspartic acid/H | Neolithic (8205-7756 BCE) | Iran / Tepe Abdul Hosein, Central Zagros / AH2 (60)                       | 0.00% | PP | Pathogenic (M2-P40) | Myopathy, ataxia, nystagmus, migraines, lactic acidosis (Heteroplasmy) |
|    |                                 | Middle Ages (10-375 CE)   | Poland / Kowalewko, Greater Poland / PCA0018 (55)                         |       |    |                     |                                                                        |
| 12 | m.8296A>G tRNA Lysine/H         | Bronze (2872-2583 BCE)    | Russia / Grachevka, Sok River, Samara / I0371 (58)                        | 0.07% | PP | Pathogenic (M2-P2)  | DMDF / MERRF / HCM / epilepsy (Heteroplasmy)                           |
| 13 | m.8328G>A tRNA Lysine/H         | Middle Ages (80-260 CE)   | Poland / Kowalewko, Greater Poland / PCA0054 (55)                         | 0.00% | LP | Pathogenic (M2-P39) | Mito Encephalopathy / EXIT with myopathy and ptosis (Heteroplasmy)     |

|    |                                                |                            |                                                      |       |    |                        |                                      |
|----|------------------------------------------------|----------------------------|------------------------------------------------------|-------|----|------------------------|--------------------------------------|
| 14 | m.8342G>A<br>rs118192103/<br>tRNA-<br>Lysine/H | Middle Ages<br>(10-375 CE) | Poland / Kowalewko, Greater<br>Poland / PCA0018 (55) | 0.00% | LP | Pathogenic<br>(M2-P53) | CPEO and Myoclonus<br>(Heteroplasmy) |
| 15 | m.12300G>A<br>tRNA<br>Leucine/H                | Middle Ages<br>(80-260 CE) | Poland / Kowalewko, Greater<br>Poland / PCA0004 (55) | 0.00% | PP | Pathogenic<br>(M0-P36) | MERRF<br>(Heteroplasmy)              |
| 16 | m.15915G>A<br>tRNA<br>Threonine/H              | Middle Ages<br>(80-120 CE) | Poland / Kowalewko, Greater<br>Poland / PCA0032 (55) | 0.00% | PP | Pathogenic<br>(M2-P30) | Encephalomyopathy<br>(Heteroplasmy)  |

207 CB Freq – GenBank frequencies; CPEO - Chronic progressive external ophthalmoplegia; MM - Mitochondrial myopathies; MERRF - Myoclonic epilepsy  
210 with ragged red fibers; MEPR - Myoclonic epilepsy and psychomotor regression; DMDF - Diabetes Mellitus + Deafness. HCM - Hypertrophic  
213 cardiomyopathy; MERRF – Myoclonic epilepsy with ragged red fibers; MEPR - Myoclonic epilepsy and psychomotor regression; MELAS - Mitochondrial  
214 Encephalomyopathy, lactic acidosis, and stroke-like episodes; MIDD - Maternally inherited diabetes and deafness; SNHL - Sensorineural hearing loss; NARP  
215 Neuropathy, ataxia and retinitis pigmentosa; Cfm Path – confirmed pathogenic; LP – likely pathogenic; PP – possibly pathogenic; M - tRNA model; P –  
216 position in tRNA model (HmtVar).

217

218

219

## 220 Discussion

221 This study establishes for the first time the presence of pathogenic mtDNA variants in 1443 ancient  
222 mtDNA Eurasian genomes from different periods, publicly available in the AmtDB database. Among  
223 the 3191 unique variants in the analyzed samples six are “confirmed pathogenic” with well-  
224 established clinical association in the contemporary patients.

225 The established “*confirmed pathogenic*” mutations are detected in samples estimated to be between  
226 1600 and 7800 years old. The oldest of these, m.7510T>C, is detected in a Neolithic sample (5800-  
227 5400 BCE). The m.5703G>A mutation was detected in a Neolithic sample that could be as old as  
228 4800 years, but it is found again in samples from later periods, Iron Age (900-600 BCE) and Middle  
229 Age (10-375 CE). Other mutations with established long histories, detected in >4000 years old Bronze  
230 Age samples are m.3243A>G "MELAS", the most common mtDNA mutation with pathogenic effect,  
231 present in contemporary populations with 0.02% frequency, and m.14674T>C, found in a 2600 old  
232 Bronze Age sample, and also found in in contemporary populations with 0.01% frequency (cf. Table  
233 1). The m.5650G>A mutation is detected in an Iron Age sample that could be as old as 2900 years.  
234 The low population frequency of these variants in contemporary populations is further corroboration  
235 of their putative pathogenic significance.

236 Two mutations with likely/possibly pathogenic effect, m.7543A>G and m.7554G>A, in the *MT-TD*  
237 gene (tRNA Aspartic acid), detected in Neolithic period samples from the Neolithic period, from the  
238 same archeological site and time span, are the oldest established mutations with putatively pathogenic  
239 effect (10200-10000 years old). Also, two Bronze Age mutations, m.8296A>G and m.4440G>A,  
240 could be as old as 4800 years. It is noteworthy that one of these, m.4440G>A, is detected in as many  
241 as 12 ancient samples from different time periods and locations. Its pathogenic effect is corroborated  
242 by that it is the most common clinically significant mutation detected in ancient mtDNA samples in

243 this study, yet it has been described as a novel mutation causing mitochondrial myopathies in  
244 contemporary patients (61). The remaining mutations in this category are detected in samples from  
245 later periods (2200-2000 years old).

246 It is noticeable that all the established ancient mutations putatively associated with diseases are located  
247 in tRNA genes, and none is in genes encoding the 13 essential polypeptides of the OXPHOS system,  
248 even though tRNAs comprise only about 10% of the total coding capacity of the mitochondrial  
249 genome (62). Epidemiological studies have highlighted that point mutations in the mt-tRNA genes  
250 are among the most common defects observed (63, 64). Mitochondrial tRNA mutations have been  
251 shown to be the most prevalent genetic defect by a survey of an adult population with mtDNA disease,  
252 accounting for more than 50% of all genetically diagnosed cases (65). More than 150 different point  
253 mutations have been described in mt-tRNA genes including novel disease-causing mutations and  
254 associated pathogenic mechanisms continue to be identified (66), yet mtRNA mutations' role in  
255 interfering with the translation mechanism remains unclear.

256 Ancient mutations putatively associated with mitochondrial diseases are in different tRNA genes and  
257 affect nucleotides in different functional parts of the encoded tRNA molecule (Table2).

258 **Table 2.** Nucleotide position in tRNA cloverleaf secondary domains of ancient mutations in tRNAs

| Nr                                | Mutation   | Gene          | Nucleotide position in tRNA cloverleaf secondary domains (loops and stems) |
|-----------------------------------|------------|---------------|----------------------------------------------------------------------------|
| <b>Confirmed Pathogenic</b>       |            |               |                                                                            |
| 1                                 | m.5703G>A  | <i>MT-TN</i>  | Position 27 in CS - Anticodon Stem                                         |
| 2                                 | m.3243A>G  | <i>MT-TLI</i> | Position 14 in DL - Dihydrouridine Loop                                    |
| 3                                 | m.5650G>A  | <i>MT-TA</i>  | Position 6 in AS - Acceptor Stem                                           |
| 4                                 | m.8340G>A  | <i>MT-TK</i>  | Position 51 in TS - T $\psi$ C Stem                                        |
| 5                                 | m.14674T>C | <i>MT-TE</i>  | Position 73 in E - 3' End                                                  |
| 6                                 | m.7510T>C  | <i>MT-TSI</i> | Position 5 in AS - Acceptor Stem                                           |
| <b>Likely/Possibly Pathogenic</b> |            |               |                                                                            |
| 7                                 | m.1624C>T  | <i>MT-TV</i>  | Position 25 in DS - Dihydrouridine Stem                                    |



|    |            |               |                                     |
|----|------------|---------------|-------------------------------------|
| 8  | m.4440G>A  | <i>MT-TM</i>  | Position 42 in CS - Anticodon Stem  |
| 9  | m.5628T>C  | <i>MT-TA</i>  | Position 31 in CS - Anticodon Stem  |
| 10 | m.7543A>G  | <i>MT-TD</i>  | Position 29 in CS - Anticodon Stem  |
| 11 | m.7554G>A  | <i>MT-TD</i>  | Position 40 in CS - Anticodon Stem  |
| 12 | m.8296A>G  | <i>MT-TK</i>  | Position 2 in AS - Acceptor Stem    |
| 13 | m.8328G>A  | <i>MT-TK</i>  | Position 39 in CS - Anticodon Stem  |
| 14 | m.8342G>A  | <i>MT-TK</i>  | Position 53 in TS - T $\psi$ C Stem |
| 15 | m.12300G>A | <i>MT-TL2</i> | Position 36 in CL - Anticodon Loop  |
| 16 | m.15915G>A | <i>MT-TT</i>  | Position 30 in CS - Anticodon Stem  |

259

260 The gene *MT-TK* coding tRNA Lysine is most commonly affected by mutations putatively associated  
261 with mitochondrial diseases in ancient mtDNA samples, i.e. one confirmed pathogenic (m.8340G>A)  
262 and three likely/possibly pathogenic (m.8296A>G, m.8328G>A and m.8342G>A). It is conceivable  
263 that these mutations have different clinical significance related to their impact on the stability of the  
264 tRNA protein.

265 A recent study on another mtDNA mutation in the same gene - m.8344 A>G, known to be associated  
266 with MERRF, has demonstrated that tRNA modifications have distinct effects on the stability and  
267 synthesis of mitochondrial proteins (45). Such regulating mechanisms conceivably contribute to  
268 human disease, and new RNA sequencing approaches to mitochondria should provide insights. Two  
269 ancient mutations were established in the *MT-TD* coding Aspartic acid. Aspartic acid is  
270 neurotransmitter and recent studies show that it may be involved in the pathogenesis of a stroke-like  
271 episode (46). The remaining putatively pathogenic mutations established in ancient mtDNA are  
272 located in different tRNA genes.

273 It is noteworthy that the established ancient mutations are located in different cloverleaf models of  
274 tRNAs. (Figure 2). The tRNA model indicates one of the four possible groups human mt-tRNAs are  
275 classified based on their structural diversity and tertiary interactions (67). Model 0 model represents

276 the quasi-canonical cloverleaf structure, with standard D-loop/T-loop interaction; Model 1- a single  
277 tRNA with an atypical anticodon stem; Model 2 – the most common among mt-RNAs, is characterized  
278 by loss of D-loop/T-loop interaction and and Model 3 - lack of D-stem. Thirteen out of the sixteen  
279 mutations putatively associated with mitochondrial disease presented in this study are in Model 2.

280 Seven out of the 16 mutations considered here are located in CS-Anticodon Stem, four in AS-Acceptor  
281 Stem, two in TS-TΨC Stem, and single mutations are located in DL-Dihydrouridine Loop, CL-  
282 Anticodon Loop and DS-Dihydrouridine Stem (Fig. 2).

283 **Figure 2.** Location on tRNA nucleotide sequence of ancient Cfrm/LP/PP mutations (HmtVar). The  
284 positions of the tRNA nucleotide sequence affected by mutations are indicated with a black arrows  
285 for cfrm mutations and blue arrows for LP/PP mutations.

286 Confirmed pathogenic mutation m.5703G>A is located on position 27 in Model 2 tRNA which is  
287 involved in post-transcriptional modifications and is adjacent to position 26, which participates in  
288 tertiary folding and is also subject to posttranscriptional modifications. Confirmed pathogenic  
289 mutation m.3243A>G in Model 0 tRNA affects position 14, which is involved in tertiary folding with  
290 interactions represented by lines on Fig. 2. Mutation m.14674T>C in Model 2 tRNA is in position 73  
291 in 3' End of the acceptor stem, which participates in 3' end-editing in the final stages of tRNA  
292 formation. The role of the remaining three confirmed pathogenic mutations is more difficult to be  
293 determined. Mutation m.5650G>A is in position 6 of the acceptor stem of a Model 2 tRNA.  
294 Pathogenic mutation m.8340G>A in position 51 of a Model 2 tRNA is located next to position 50  
295 nucleotide involved in post-transcriptional modifications.

296 Three mutations with putatively pathogenic effect are in positions that affect the structure and the  
297 function of the tRNA, m.12300G>A in position 36 of the CL-Anticodon Loop, m.8328G>A in  
298 position 39 and m.7554G>A in position 40 that all have impact on post-transcriptional modifications.

299 Mutations in tRNA genes could lead to disturbances of three dimensional structure, the absence of  
300 post-transcriptional modifications of the tRNA, rise in the number of errors and thus tRNA  
301 destabilization.

302 These changes could have an effect on the codon decoding speed, leading to accumulation of cell  
303 damaging proteins and cutback of mitochondrial protein synthesis, including reduction of OXPHOS  
304 proteins and insufficiency of the OXPHOS constituent complexes I, III, and IV. Despite the clinical  
305 significance, the molecular mechanisms leading to such disturbances remain poorly understood.

306 As is often happens in ancient DNA analyses, because the amount of endogenous template DNA is  
307 typically very low, the surviving molecules are typically short and affected by post-mortem cytosine  
308 deamination damage which appears as C>T and G>A variants in sequence data (68). It is noteworthy  
309 to mention that 12 out of the 19 (63.2%) pathogenic or putatively pathogenic mutations that we detect  
310 in the analyzed ancient mtDNA samples are G>A or C>T substitutions. Review of the publications  
311 that present the analyzed ancient mtDNA genomes substantiates that the authors have employed  
312 adequate analyses to mitigate the effect of post mortem damage (PMD), strengthening our confidence  
313 that these are real variants and not the result of PMD (27, 69, 70).

314 Still, pathogenic mutations in mitochondrial DNA, often show highly variable phenotypes for any  
315 given point mutation and severity of the clinical and biochemical phenotype has been roughly  
316 proportionate to the percent mutant heteroplasmy (10, 41). Identifying heteroplasmic variants and  
317 establishing the level of heteroplasmy in ancient samples is not a trivial task. Heteroplasmic variants  
318 however constitute the bulk of disease-associated mtDNA variants in contemporary humans, and most

319 of the detected pathogenic or putatively pathogenic variants in our study have pathogenic effect in  
320 heteroplasmic state. Nevertheless due to insufficient phenotypic data about the human remains, there  
321 is no way of exactly knowing if disease-associated mutations, or those predicted to have a strong  
322 functional effect, were indeed pathogenic in ancient populations.

### 323 **Conclusion**

324 The established mtDNA pathogenic mutations in the analyzed ancient samples are putatively  
325 associated with a wide range of mitochondrial diseases found in contemporary populations. Studying  
326 putative pathogenic mutations from ancient mtDNA informs on the mitochondrial disease spectrum  
327 in ancient times, and comparing their frequencies among populations separated by significant time  
328 periods sheds light on the history of the disease. Our findings suggest that disease associated genes  
329 are often genes with long history rather than newly evolved genes (71), warranting further research  
330 attention. The dynamics of the prevalence of putative pathogenic variants in paleogenetic and  
331 contemporary genetic data can be used to predict the future course of human microevolution.

### 332 **Contributions**

333 D.T. – conceived the study, analyzed results, discussed data and wrote the paper; D.S., S.K.-Y.,  
334 D.N. – analyzed results, discussed data. All authors reviewed the manuscript.

### 335 **Corresponding author**

336 Correspondence to [dragatoncheva@gmail.com](mailto:dragatoncheva@gmail.com)

### 337 **Competing interests**

338 The authors declare no competing interests.

### 339 **References**

- 340 1. Binder M, Roberts C, Spencer N, Antoine D, Cartwright C. On the antiquity of cancer: evidence for  
341 metastatic carcinoma in a young man from ancient Nubia (c. 1200 BC). *PloS one*. 2014;9(3):e90924.
- 342 2. Edward JO, Patrick SR-Q, Maryna S, Zach T, Jacqueline SS, Bernhard Z, et al. Earliest hominin  
343 cancer: 1.7-million-year-old osteosarcoma from Swartkrans Cave, South Africa. *South African Journal of*  
344 *Science*. 2016;112(7/8).
- 345 3. Entezami P, Fox DA, Clapham PJ, Chung KC. Historical perspective on the etiology of rheumatoid  
346 arthritis. *Hand Clin*. 2011;27(1):1-10.
- 347 4. Phelan J, Weiner M, Ricci J, Plummer T, Gauld S, Potts R, et al. Diagnosis of the pathology of the  
348 Kanam mandible. *Oral Surgery, Oral Medicine, Oral Pathology, Oral Radiology and Endodontology*.  
349 2007;4(103):e20.
- 350 5. Monge J, Kricun M, Radovčić J, Radovčić D, Mann A, Frayer DW. Fibrous dysplasia in a 120,000+  
351 year old Neandertal from Krapina, Croatia. *PloS one*. 2013;8(6):e64539.
- 352 6. Odes EJ, Randolph-Quinney PS, Steyn M, Throckmorton Z, Smilg JS, Zipfel B, et al. Earliest hominin  
353 cancer: 1.7-million-year-old osteosarcoma from Swartkrans Cave, South Africa. *South African Journal of*  
354 *Science*. 2016;112(7-8):1-5.
- 355 7. Murphy Jr WA, Nedden Dz, Gostner P, Knapp R, Recheis W, Seidler H. The iceman: discovery and  
356 imaging. *Radiology*. 2003;226(3):614-29.
- 357 8. Berens AJ, Cooper TL, Lachance J. The genomic health of ancient hominins. *Human biology*.  
358 2017;89(1):7-20.
- 359 9. Wallace DC, Singh G, Lott MT, Hodge JA, Schurr TG, Lezza A, et al. Mitochondrial DNA mutation  
360 associated with Leber's hereditary optic neuropathy. *Science*. 1988;242(4884):1427-30.
- 361 10. Jeppesen TD, Schwartz M, Olsen DB, Vissing J. Oxidative capacity correlates with muscle mutation  
362 load in mitochondrial myopathy. *Annals of Neurology*. 2003;54(1):86-92.

- 363 11. van den Ouweland JMW, Lemkes HHPJ, Trembath RC, Ross R, Velho G, Cohen D, et al. Maternally  
364 inherited diabetes and deafness is a distinct subtype of diabetes and associates with a single point  
365 mutation in the mitochondrial tRNA <sup>&sup></sup>Leu(UUR) gene. *Diabetes*. 1994;43(6):746.
- 366 12. Ghelli A, Porcelli AM, Zanna C, Vidoni S, Mattioli S, Barbieri A, et al. The background of  
367 mitochondrial DNA haplogroup J increases the sensitivity of Leber's hereditary optic neuropathy cells to 2,  
368 5-hexanedione toxicity. *PloS one*. 2009;4(11):e7922.
- 369 13. Caporali L, Maresca A, Capristo M, Del Dotto V, Tagliavini F, Valentino ML, et al. Incomplete  
370 penetrance in mitochondrial optic neuropathies. *Mitochondrion*. 2017;36:130-7.
- 371 14. Wallace DC. Mitochondrial DNA mutations in disease and aging. *Environmental and molecular*  
372 *mutagenesis*. 2010;51(5):440-50.
- 373 15. Modi A, Nesheva D, Sarno S, Vai S, Karachanak-Yankova S, Luiselli D, et al. Ancient human  
374 mitochondrial genomes from Bronze Age Bulgaria: new insights into the genetic history of Thracians.  
375 *Scientific reports*. 2019;9(1):5412.
- 376 16. Landrum MJ, Lee JM, Riley GR, Jang W, Rubinstein WS, Church DM, et al. ClinVar: public archive of  
377 relationships among sequence variation and human phenotype. *Nucleic acids research*.  
378 2013;42(D1):D980-D5.
- 379 17. Lott MT, Leipzig JN, Derbeneva O, Xie HM, Chalkia D, Sarmady M, et al. mtDNA variation and  
380 analysis using MITOMAP and MITOMASTER. *Current protocols in bioinformatics*. 2013;44(1):1.23. 1-1.. 6.
- 381 18. Ehler E, Novotný J, Juras A, Chyleński M, Moravčík O, Pačes J. AmtDB: a database of ancient human  
382 mitochondrial genomes. *Nucleic acids research*. 2018;47(D1):D29-D32.
- 383 19. Mitchell AL, Elson JL, Howell N, Taylor RW, Turnbull DM. Sequence variation in mitochondrial  
384 complex I genes: mutation or polymorphism? *Journal of medical genetics*. 2006;43(2):175.

- 385 20. Yarham JW, Al-Dosary M, Blakely EL, Alston CL, Taylor RW, Elson JL, et al. A comparative analysis  
386 approach to determining the pathogenicity of mitochondrial tRNA mutations. *Human Mutation*.  
387 2011;32(11):1319-25.
- 388 21. Wong L-JC. Pathogenic mitochondrial DNA mutations in protein-coding genes. *Muscle & Nerve*.  
389 2007;36(3):279-93.
- 390 22. González-Vioque E, Bornstein B, Gallardo ME, Fernández-Moreno MÁ, Garesse R. The  
391 pathogenicity scoring system for mitochondrial tRNA mutations revisited. *Molecular Genetics & Genomic*  
392 *Medicine*. 2014;2(2):107-14.
- 393 23. Brandon MC, Ruiz-Pesini E, Mishmar D, Procaccio V, Lott MT, Nguyen KC, et al. MITOMASTER: a  
394 bioinformatics tool for the analysis of mitochondrial DNA sequences. *Human mutation*. 2009;30(1):1-6.
- 395 24. Clark K, Karsch-Mizrachi I, Lipman DJ, Ostell J, Sayers EW. GenBank. *Nucleic acids research*.  
396 2016;44(D1):D67-D72.
- 397 25. Sonney S, Leipzig J, Lott MT, Zhang S, Procaccio V, Wallace DC, et al. Predicting the pathogenicity  
398 of novel variants in mitochondrial tRNA with MitoTIP. *PLOS Computational Biology*.  
399 2017;13(12):e1005867.
- 400 26. Preste R, Vitale O, Clima R, Gasparre G, Attimonelli M. HmtVar: a new resource for human  
401 mitochondrial variations and pathogenicity data. *Nucleic acids research*. 2018;47(D1):D1202-D10.
- 402 27. Damgaard PdB, Marchi N, Rasmussen S, Peyrot M, Renaud G, Korneliussen T, et al. 137 ancient  
403 human genomes from across the Eurasian steppes. *Nature*. 2018;557(7705):369-74.
- 404 28. Moraes CT, Ciacci F, Bonilla E, Jansen C, Hirano M, Rao N, et al. Two novel pathogenic  
405 mitochondrial DNA mutations affecting organelle number and protein synthesis. Is the tRNA(Leu(UUR))  
406 gene an etiologic hot spot? *The Journal of clinical investigation*. 1993;92(6):2906-15.

- 407 29. Vives-Bauza C, Del Toro M, Solano A, Montoya J, Andreu A, Roig M. Genotype–phenotype  
408 correlation in the 5703G> A mutation in the tRNAAsn gene of mitochondrial DNA. *Journal of inherited*  
409 *metabolic disease*. 2003;26(5):507-8.
- 410 30. Altmann J, Büchner B, Nadaj-Pakleza A, Schäfer J, Jackson S, Lehmann D, et al. Expanded  
411 phenotypic spectrum of the m. 8344A> G “MERRF” mutation: data from the German mitoNET registry.  
412 *Journal of neurology*. 2016;263(5):961-72.
- 413 31. Fu J, Ma M-M, Pang M, Yang L, Li G, Song J, et al. Broadening the phenotype of m.5703G>A  
414 mutation in mitochondrial tRNAAsn gene from mitochondrial myopathy to myoclonic epilepsy with ragged  
415 red fibers syndrome. *Chin Med J (Engl)*. 2019;132(7):865-7.
- 416 32. Finsterer J. Is the MT-TN variant m.5703G>A truly causative for myoclonic epilepsy with ragged  
417 red fibers syndrome plus? *Chin Med J (Engl)*. 2019;132(14):1752.
- 418 33. Nesbitt V, Pitceathly RD, Turnbull DM, Taylor RW, Sweeney MG, Mudanohwo EE, et al. The UK  
419 MRC Mitochondrial Disease Patient Cohort Study: clinical phenotypes associated with the m. 3243A> G  
420 mutation—implications for diagnosis and management. *J Neurol Neurosurg Psychiatry*. 2013;84(8):936-8.
- 421 34. Pickett SJ, Grady JP, Ng YS, Gorman GS, Schaefer AM, Wilson IJ, et al. Phenotypic heterogeneity in  
422 m.3243A>G mitochondrial disease: The role of nuclear factors. *Ann Clin Transl Neurol*. 2018;5(3):333-45.
- 423 35. Tranah GJ, Katzman SM, Lauterjung K, Yaffe K, Manini TM, Kritchevsky S, et al. Mitochondrial DNA  
424 m.3243A > G heteroplasmy affects multiple aging phenotypes and risk of mortality. *Scientific reports*.  
425 2018;8(1):11887.
- 426 36. Kaufmann P, Engelstad K, Wei Y, Kulikova R, Oskoui M, Sproule DM, et al. Natural history of MELAS  
427 associated with mitochondrial DNA m.3243A>G genotype. *Neurology*. 2011;77(22):1965-71.
- 428 37. Suzuki S, Hinokio Y, Ohtomo M, Hirai M, Hirai A, Chiba M, et al. The effects of coenzyme Q10  
429 treatment on maternally inherited diabetes mellitus and deafness, and mitochondrial DNA 3243 (A to G)  
430 mutation. *Diabetologia*. 1998;41(5):584-8.



- 431 38. Souilem S, Chebel S, Mancuso M, Petrozzi L, Siciliano G, FrihAyed M, et al. A novel mitochondrial  
432 tRNA<sup>Ala</sup> point mutation associated with chronic progressive external ophthalmoplegia and hyperCKemia.  
433 Journal of the neurological sciences. 2011;300(1-2):187-90.
- 434 39. Manouvrier S, Rotig A, Hannebique G, Gheerbrandt JD, Royer-Legrain G, Munnich A, et al. Point  
435 mutation of the mitochondrial tRNA(Leu) gene (A 3243 G) in maternally inherited hypertrophic  
436 cardiomyopathy, diabetes mellitus, renal failure, and sensorineural deafness. Journal of medical genetics.  
437 1995;32(8):654-6.
- 438 40. Moraes CT, Ciacci F, Silvestri G, Shanske S, Sciacco M, Hirano M, et al. Atypical clinical  
439 presentations associated with the MELAS mutation at position 3243 of human mitochondrial DNA.  
440 Neuromuscular disorders : NMD. 1993;3(1):43-50.
- 441 41. Goto Y, Nonaka I, Horai S. A mutation in the tRNA(Leu)(UUR) gene associated with the MELAS  
442 subgroup of mitochondrial encephalomyopathies. Nature. 1990;348(6302):651-3.
- 443 42. Montagna P, Sacquegna T, Martinelli P, Cortelli P, Bresolin N, Moggio M, et al. Mitochondrial  
444 abnormalities in migraine. Preliminary findings. Headache. 1988;28(7):477-80.
- 445 43. McFarland R, Swalwell H, Blakely EL, He L, Groen EJ, Turnbull DM, et al. The m.5650G>A  
446 mitochondrial tRNA<sup>Ala</sup> mutation is pathogenic and causes a phenotype of pure myopathy. Neuromuscular  
447 disorders : NMD. 2008;18(1):63-7.
- 448 44. Finnila S, Tuisku S, Herva R, Majamaa K. A novel mitochondrial DNA mutation and a mutation in  
449 the Notch3 gene in a patient with myopathy and CADASIL. Journal of molecular medicine (Berlin,  
450 Germany). 2001;79(11):641-7.
- 451 45. Jeppesen TD, Duno M, Risom L, Wibrand F, Rafiq J, Krag T, et al. A novel de novo mutation of the  
452 mitochondrial tRNA<sup>Lys</sup> gene mt. 8340G> a associated with pure myopathy. Neuromuscular Disorders.  
453 2014;24(2):162-6.

- 454 46. Gill JS, Hardy SA, Blakely EL, Hopton S, Nemeth AH, Fratter C, et al. Pigmentary retinopathy, rod-  
455 cone dysfunction and sensorineural deafness associated with a rare mitochondrial tRNA(Lys) (m.8340G>A)  
456 gene variant. *Br J Ophthalmol*. 2017;101(9):1298-302.
- 457 47. Tarnopolsky MA, Sundaram ANE, Provias J, Brady L, Sadikovic B. CPEO - Like mitochondrial  
458 myopathy associated with m.8340G>A mutation. *Mitochondrion*. 2019;46:69-72.
- 459 48. Horvath R, Kemp JP, Tuppen HA, Hudson G, Oldfors A, Marie SK, et al. Molecular basis of infantile  
460 reversible cytochrome c oxidase deficiency myopathy. *Brain : a journal of neurology*. 2009;132(Pt  
461 11):3165-74.
- 462 49. Uusimaa J, Jungbluth H, Fratter C, Crisponi G, Feng L, Zeviani M, et al. Reversible infantile  
463 respiratory chain deficiency is a unique, genetically heterogenous mitochondrial disease. *Journal of*  
464 *medical genetics*. 2011;48(10):660-8.
- 465 50. Komlósi K, Maasz A, Kisfali P, Hadzsiev K, Bene J, Melegh BI, et al. Non-syndromic Hearing  
466 Impairment in a Hungarian Family with the m. 7510T> C Mutation of Mitochondrial tRNA Ser (UCN) and  
467 Review of Published Cases. *JIMD Reports—Case and Research Reports*, 2012/6: Springer; 2012. p. 105-11.
- 468 51. Hutchin TP, Parker MJ, Young ID, Davis AC, Pulleyn LJ, Deeble J, et al. A novel mutation in the  
469 mitochondrial tRNA<sup>Ser</sup> (UCN) gene in a family with non-syndromic sensorineural hearing impairment.  
470 *Journal of medical genetics*. 2000;37(9):692-4.
- 471 52. del Castillo FJ, Villamar M, Moreno-Pelayo MA, Almela JJ, Morera C, Adiego I, et al. Maternally  
472 inherited non-syndromic hearing impairment in a Spanish family with the 7510T>C mutation in the  
473 mitochondrial tRNA(Ser(UCN)) gene. *Journal of medical genetics*. 2002;39(12):e82-e.
- 474 53. Labay V, Garrido G, Madeo A, Nance W, Friedman T, Friedman P, et al. Haplogroup analysis  
475 supports a pathogenic role for the 7510T> C mutation of mitochondrial tRNA<sup>Ser</sup> (UCN) in sensorineural  
476 hearing loss. *Clinical genetics*. 2008;73(1):50-4.

- 477 54. Kytövuori L, Gardberg M, Majamaa K, Martikainen MH. The m. 7510T> C mutation: Hearing  
478 impairment and a complex neurologic phenotype. *Brain and behavior*. 2017;7(12):e00859.
- 479 55. Schroeder H, Margaryan A, Szmyt M, Theulot B, Włodarczak P, Rasmussen S, et al. Unraveling  
480 ancestry, kinship, and violence in a Late Neolithic mass grave. *Proceedings of the National Academy of*  
481 *Sciences*. 2019;116(22):10705.
- 482 56. Stolarek I, Juras A, Handschuh L, Marcinkowska-Swojak M, Philips A, Zenczak M, et al. A mosaic  
483 genetic structure of the human population living in the South Baltic region during the Iron Age. *Scientific*  
484 *reports*. 2018;8(1):2455.
- 485 57. Knipper C, Mittnik A, Massy K, Kociumaka C, Kucukkalipci I, Maus M, et al. Female exogamy and  
486 gene pool diversification at the transition from the Final Neolithic to the Early Bronze Age in central  
487 Europe. *Proceedings of the National Academy of Sciences*. 2017;114(38):10083.
- 488 58. Mathieson I, Alpaslan-Roodenberg S, Posth C, Szécsényi-Nagy A, Rohland N, Mallick S, et al. The  
489 genomic history of southeastern Europe. *Nature*. 2018;555(7695):197-203.
- 490 59. Juras A, Krzewińska M, Nikitin AG, Ehler E, Chyleński M, Łukasik S, et al. Diverse origin of  
491 mitochondrial lineages in Iron Age Black Sea Scythians. *Scientific reports*. 2017;7(1):43950.
- 492 60. Broushaki F, Thomas MG, Link V, López S, van Dorp L, Kirsanow K, et al. Early Neolithic genomes  
493 from the eastern Fertile Crescent. *Science*. 2016;353(6298):499.
- 494 61. Scarpelli M, Carreño-Gago L, Russignan A, de Luna N, Carnicer-Cáceres C, Ariatti A, et al.  
495 Identification and characterization of the novel m. 8305C> T MTTK and m. 4440G> A MTTM gene  
496 mutations causing mitochondrial myopathies. *Neuromuscular Disorders*. 2018;28(2):137-43.
- 497 62. Anderson S, Bankier AT, Barrell BG, de Bruijn MHL, Coulson AR, Drouin J, et al. Sequence and  
498 organization of the human mitochondrial genome. *Nature*. 1981;290(5806):457-65.
- 499 63. Majamaa K, Moilanen JS, Uimonen S, Remes AM, Salmela PI, Kärppä M, et al. Epidemiology of  
500 A3243G, the Mutation for Mitochondrial Encephalomyopathy, Lactic Acidosis, and Strokelike Episodes:

501 Prevalence of the Mutation in an Adult Population. *The American Journal of Human Genetics*.  
502 1998;63(2):447-54.

503 64. Manwaring N, Jones MM, Wang JJ, Rochtchina E, Howard C, Mitchell P, et al. Population  
504 prevalence of the MELAS A3243G mutation. *Mitochondrion*. 2007;7(3):230-3.

505 65. Schaefer AM, McFarland R, Blakely EL, He L, Whittaker RG, Taylor RW, et al. Prevalence of  
506 mitochondrial DNA disease in adults. *Annals of Neurology*. 2008;63(1):35-9.

507 66. Sacconi S, Salviati L, Nishigaki Y, Walker WF, Hernandez-Rosa E, Trevisson E, et al. A functionally  
508 dominant mitochondrial DNA mutation. *Human molecular genetics*. 2008;17(12):1814-20.

509 67. Diroma MA, Lubisco P, Attimonelli M. A comprehensive collection of annotations to interpret  
510 sequence variation in human mitochondrial transfer RNAs. *BMC Bioinformatics*. 2016;17(12):338.

511 68. Thomas M, Gilbert P. Postmortem damage of mitochondrial DNA. *Human Mitochondrial DNA and*  
512 *the Evolution of Homo sapiens*: Springer; 2006. p. 91-115.

513 69. Schroeder H, Margaryan A, Szmyt M, Theulot B, Włodarczak P, Rasmussen S, et al. Unraveling  
514 ancestry, kinship, and violence in a Late Neolithic mass grave. *Proceedings of the National Academy of*  
515 *Sciences*. 2019;116(22):10705-10.

516 70. Knipper C, Mittnik A, Massy K, Kociumaka C, Kucukkalipci I, Maus M, et al. Female exogamy and  
517 gene pool diversification at the transition from the Final Neolithic to the Early Bronze Age in central  
518 Europe. *Proceedings of the National Academy of Sciences*. 2017:201706355.

519 71. Domazet-Lošo T, Tautz D. An ancient evolutionary origin of genes associated with human genetic  
520 diseases. *Molecular biology and evolution*. 2008;25(12):2699-707.

521

Figure 1.

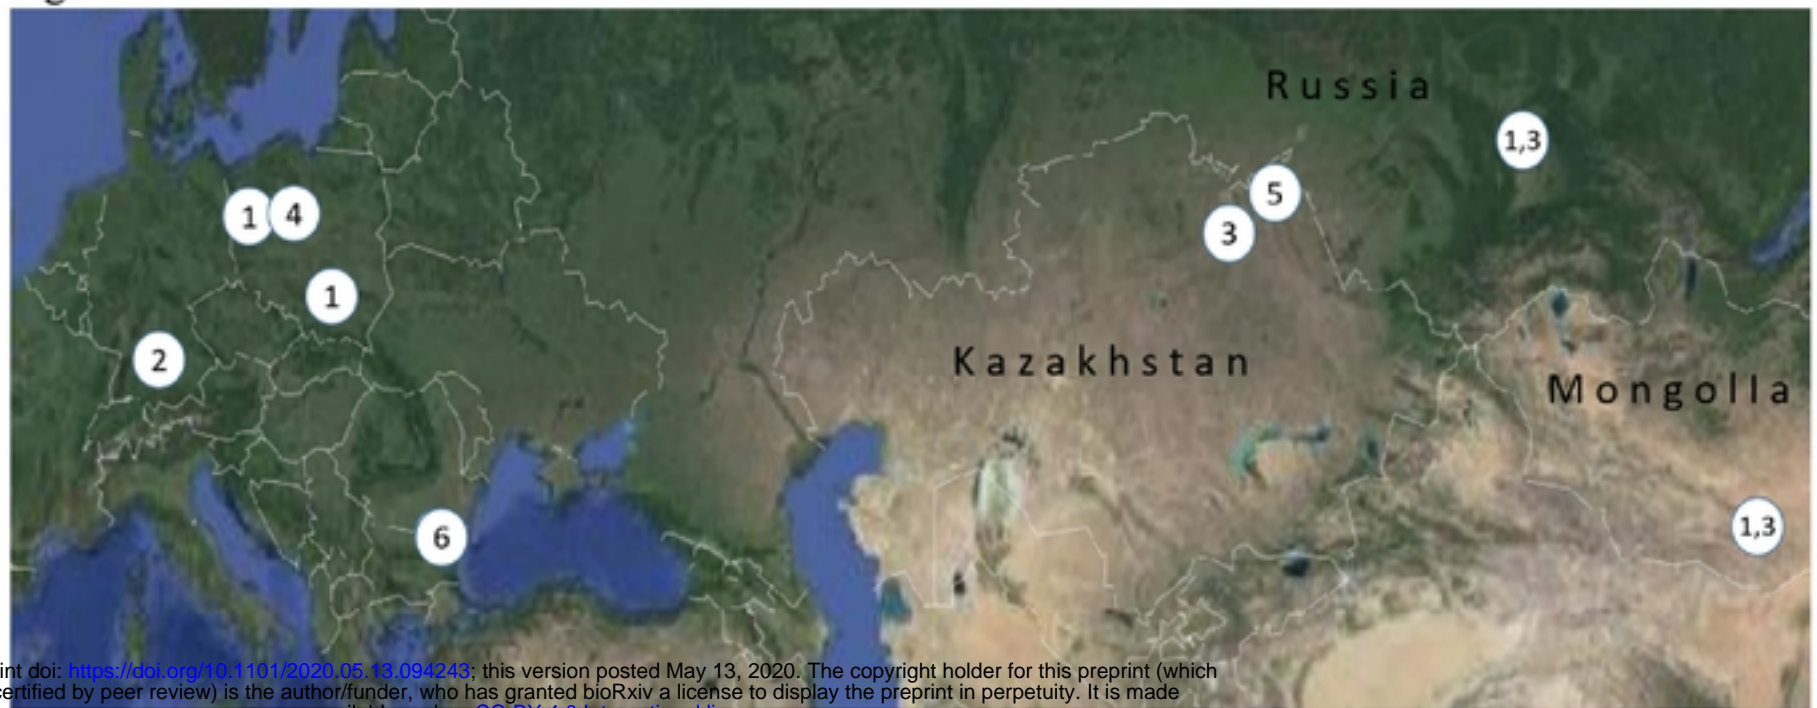

bioRxiv preprint doi: <https://doi.org/10.1101/2020.05.13.094243>; this version posted May 13, 2020. The copyright holder for this preprint (which was not certified by peer review) is the author/funder, who has granted bioRxiv a license to display the preprint in perpetuity. It is made available under aCC-BY 4.0 International license.

Figure 2.

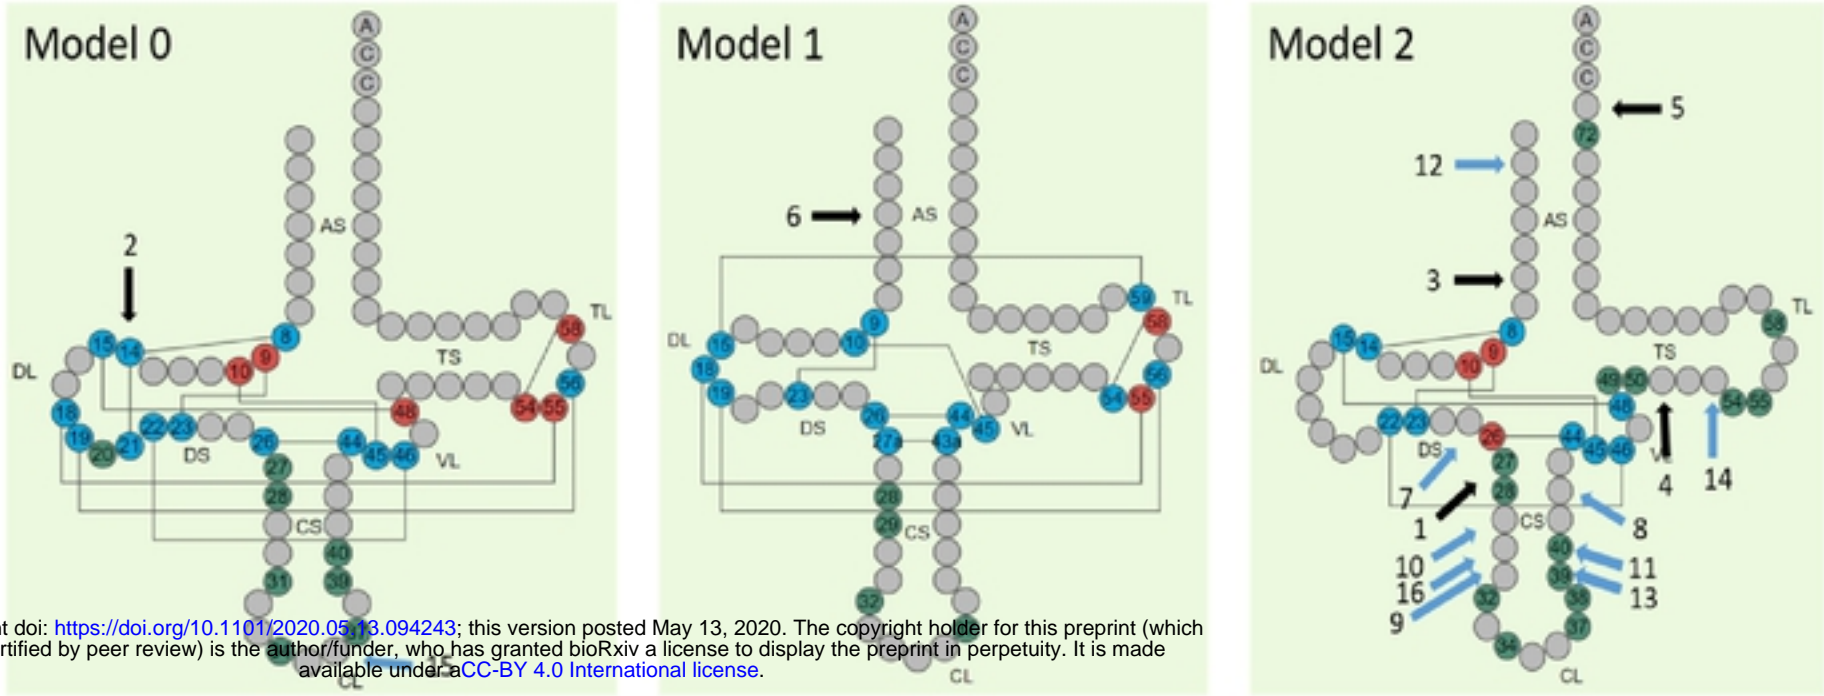

bioRxiv preprint doi: <https://doi.org/10.1101/2020.05.13.094243>; this version posted May 13, 2020. The copyright holder for this preprint (which was not certified by peer review) is the author/funder, who has granted bioRxiv a license to display the preprint in perpetuity. It is made available under aCC-BY 4.0 International license.
